# Supplementary material for: Titanium oxo-clusters derivatized from the Ti10O12(cat)8(py)8 complex: structural investigation and spectroscopic studies of light absorption
Source: Royal Society of Chemistry journal article supplement (doi:10.1039/c6dt00632a), 2016-01-01
Supplement: c6dt00632a1.pdf [file c6dt00632a1.pdf]

## Titanium oxo-clusters derivatized from the $\text{Ti}_{10}\text{O}_{12}(\text{cat})_8(\text{py})_8$ complex: Structural investigation and spectroscopic studies of light absorption

Clément Chaumont,<sup>a</sup> Alain Chaumont,<sup>a,c</sup> Nathalie Kyritsakas,<sup>b</sup> Pierre Mobian,<sup>a\*</sup> Marc Henry<sup>a</sup>

<sup>a</sup> Laboratoire de Chimie Moléculaire de l'Etat Solide, UMR UDS-CNRS 7140, Université de Strasbourg Institut Le Bel, 4, rue Blaise Pascal, F-67000 Strasbourg, France.

*mobian@unistra.fr.*

<sup>b</sup> Laboratoire de Tectonique Moléculaire, UMR UDS-CNRS 7140, icFRC, University of Strasbourg, Institut Le Bel, 4, rue Blaise Pascal, F-67000 Strasbourg, France.

<sup>c</sup> Laboratoire de Modélisation et Simulations Moléculaires, UMR UDS-CNRS 7177, University of Strasbourg, Tour de Chimie, 1, rue Blaise Pascal, F-67000 Strasbourg, France.

## Supporting information

Table 1: Ti-N bond lengths measured from the structures of  $\text{Ti}_{10}\text{O}_{12}(\text{cat})_8(\text{py})_8$ ,  $\text{Ti}_{10}\text{O}_{12}(\text{cat})_8(\text{pico})_8$ ,  $\text{Ti}_{10}\text{O}_{12}(\text{cat})_8(4\text{-Phpy})_8$  and  $\text{Ti}_{10}\text{O}_{12}(\text{cat})_8(\text{pyrald})_8$ .

|                                                              | Ti-N bond | Distance (Å) |
|--------------------------------------------------------------|-----------|--------------|
| $\text{Ti}_{10}\text{O}_{12}(\text{cat})_8(\text{py})_8$     | Ti1-N2    | 2.226(2)     |
|                                                              | Ti2-N1    | 2.228(8)     |
| $\text{Ti}_{10}\text{O}_{12}(\text{cat})_8(\text{pico})_8$   | Ti1-N1    | 2.294(5)     |
|                                                              | Ti2-N2    | 2.239(5)     |
|                                                              | Ti3-N3    | 2.281(5)     |
|                                                              | Ti4-N4    | 2.249(5)     |
|                                                              | Ti5-N5    | 2.269(4)     |
|                                                              | Ti7-N6    | 2.256(5)     |
|                                                              | Ti9-N7    | 2.249(4)     |
|                                                              | Ti10-N8   | 2.271(6)     |
| $\text{Ti}_{10}\text{O}_{12}(\text{cat})_8(4\text{-Phpy})_8$ | Ti1-N1    | 2.293(4)     |
|                                                              | Ti3-N2    | 2.272(4)     |
| $\text{Ti}_{10}\text{O}_{12}(\text{cat})_8(\text{pyrald})_8$ | Ti1-N1    | 2.25(1)      |
|                                                              | Ti2-N2    | 2.31(1)      |

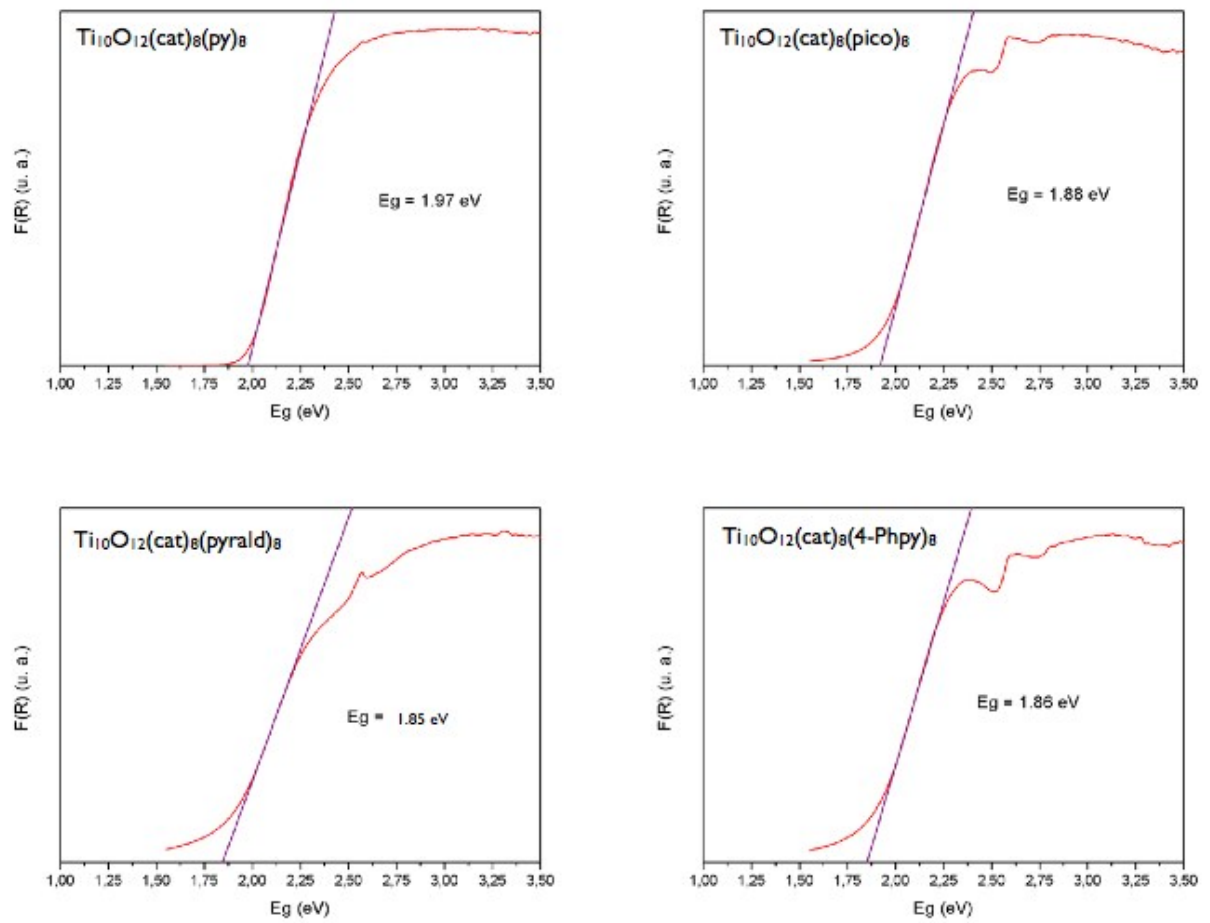

Figure 1 : Band gaps in  $\text{Ti}_{10}\text{O}_{12}(\text{cat})_8(\text{py})_8$ ,  $\text{Ti}_{10}\text{O}_{12}(\text{cat})_8(\text{pico})_8$ ,  $\text{Ti}_{10}\text{O}_{12}(\text{cat})_8(\text{pyrald})_8$ , and  $\text{Ti}_{10}\text{O}_{12}(\text{cat})_8(4\text{-Phpy})_8$  determined by using direct analysis of the absorption edges.

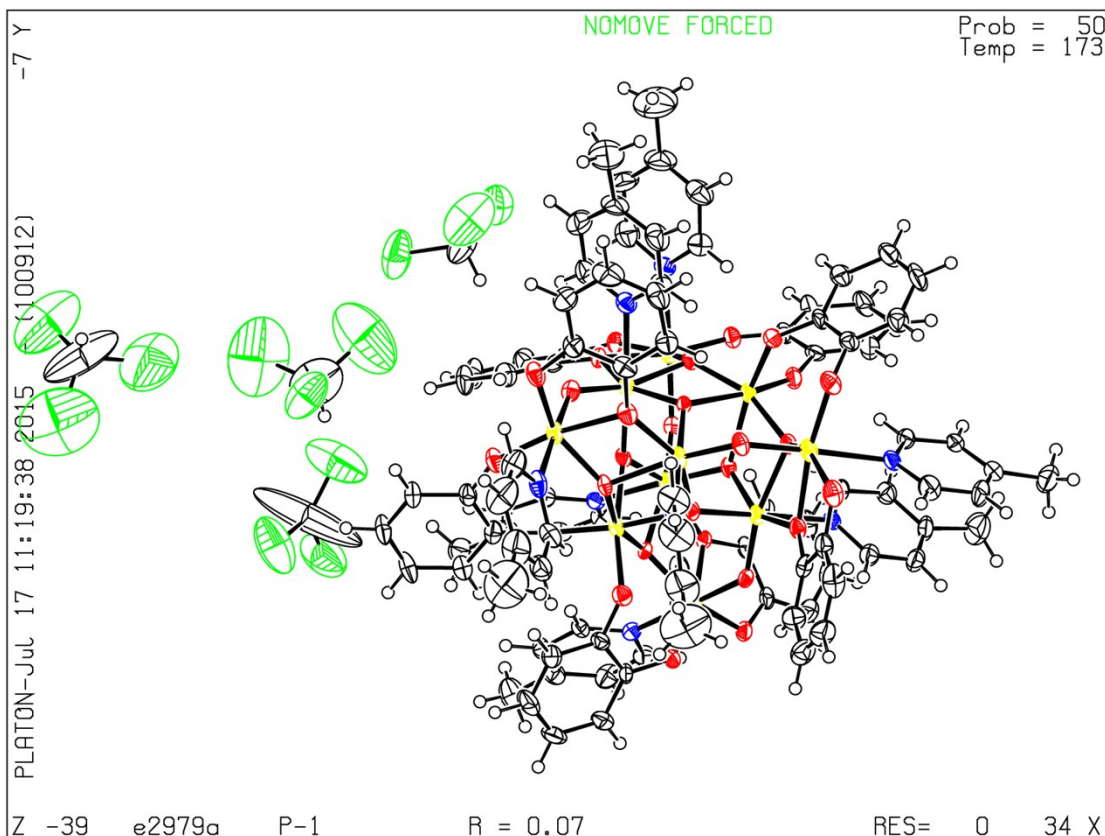

Figure 2 : Ellipsoid plot of the  $\text{Ti}_{10}\text{O}_{12}(\text{cat})_8(\text{pico})_8$  structure

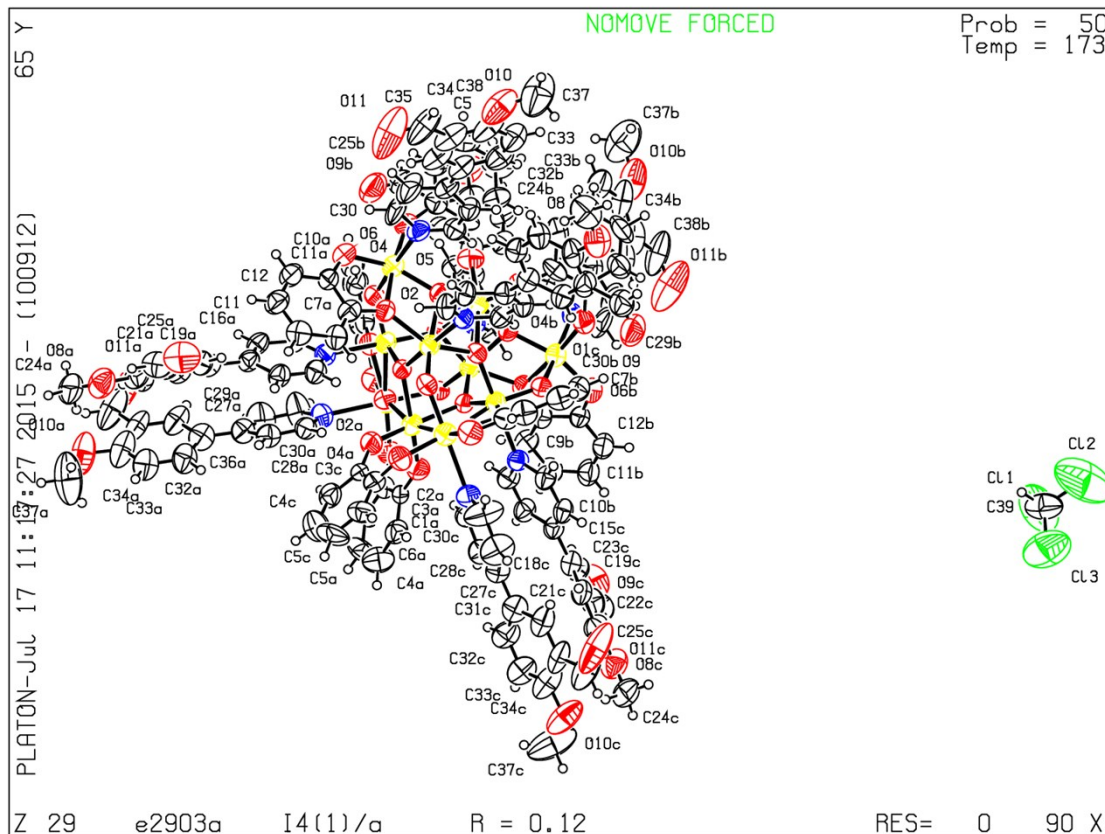

Figure 3: Ellipsoid plot of the  $\text{Ti}_{10}\text{O}_{12}(\text{cat})_8(\text{pyrald})_8$  structure

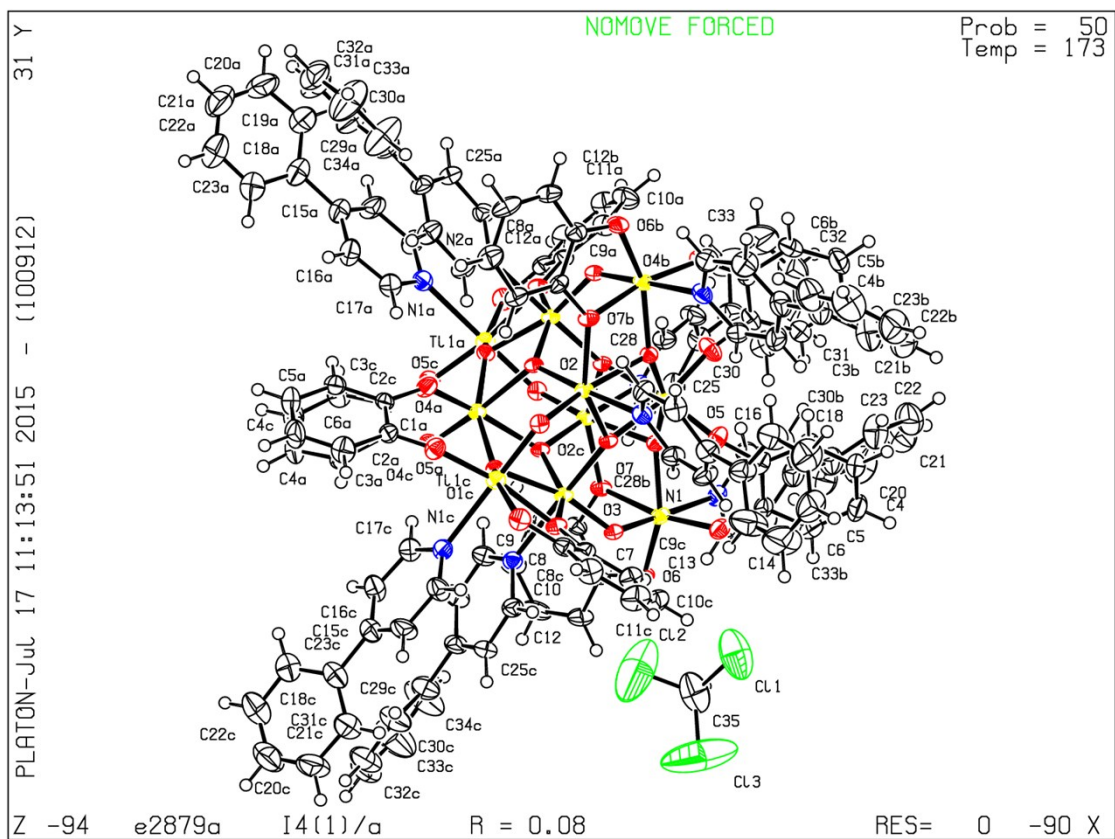

Figure 4: Ellipsoid plot of the  $\text{Ti}_{10}\text{O}_{12}(\text{cat})_8(4\text{-Phpy})_8$  structure
